# Supplementary material for: Pulsed chemical vapor deposition of conformal GeSe for application as an OTS selector
Source: Royal Society of Chemistry journal article supplement (doi:10.1039/d0ma01014f), 2021-01-01
Supplement: d0ma01014f1.pdf [file d0ma01014f1.pdf]

## Supplementary information

### Pulsed chemical vapour deposition of conformal GeSe for application as OTS selector

Ali Haider<sup>1</sup>, Shaoren Deng<sup>2</sup>, Wouter Devulder<sup>1</sup>, Jan Willem Maes<sup>2</sup>, Jean-Marc Girard<sup>3</sup>, Gabriel Khalil El Hajjam<sup>1</sup>, Gouri Sankar Kar<sup>1</sup>, Karl Opsomer<sup>1,4</sup>, Christophe Detavernier<sup>1,4</sup>, Michael Givens<sup>2</sup>, Ludovic Goux<sup>1</sup>, Sven Van Elshocht<sup>1</sup>, Romain Delhougne<sup>1</sup>, Annelies Delabie<sup>1,5</sup>, [Matty Caymax](mailto:matty.caymax@imec.be)<sup>1</sup>, Johan Swerts<sup>1</sup>

<sup>1</sup> IMEC, Belgium ([matty.caymax@imec.be](mailto:matty.caymax@imec.be))

<sup>2</sup> ASM-Belgium, Belgium

<sup>3</sup> Air Liquide, France

<sup>4</sup> TU Ghent, Belgium

<sup>5</sup> KU Leuven, Belgium

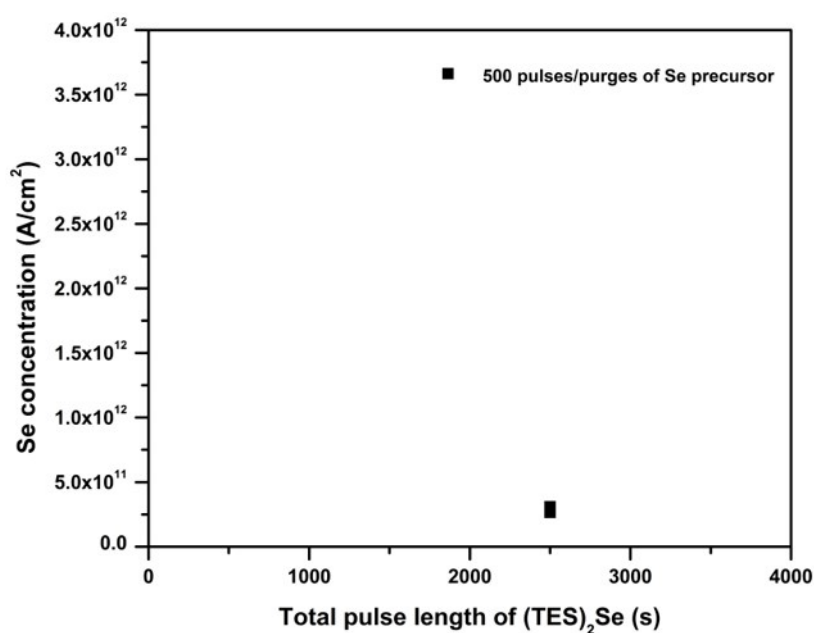

Figure S1: Se concentration vs total pulse length of (TES)<sub>2</sub>Se on Si substrate: no Se chemisorption occurred on Si substrate.

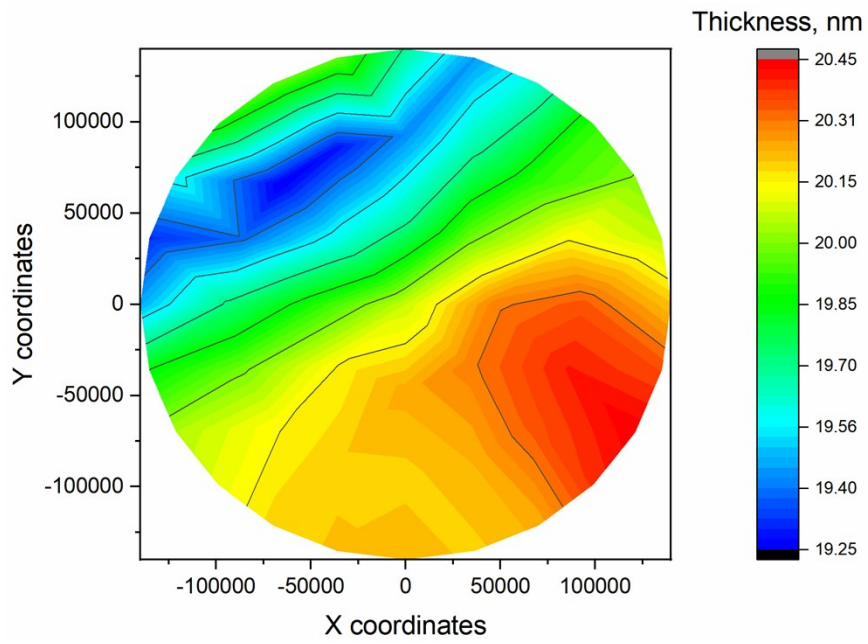

Figure S2: Ellipsometer contour map revealing the thickness uniformity of GeSe across 300 mm wafer

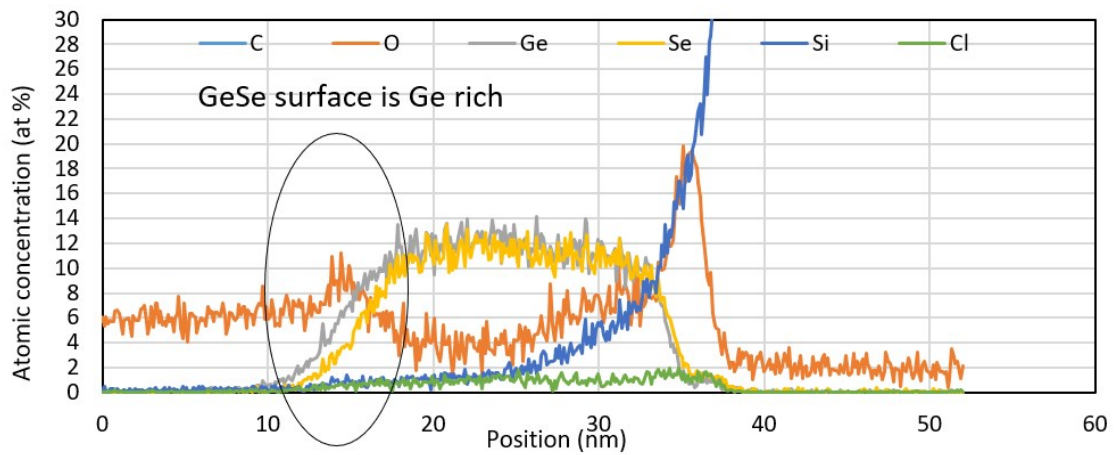

Figure S3: EDS line scan of GeSe sample across air-GeSe interface to GeSe-Si interface.
